# Supplementary material for: 2022 American College of Rheumatology/European Alliance of Associations for Rheumatology Classification Criteria for Eosinophilic Granulomatosis with Polyangiitis
Source: HighWire-hosted journal article supplement (doi:10.1136/annrheumdis-2021-221794), 2022-02-02

## **SUPPLEMENTARY MATERIAL**

### **AMERICAN COLLEGE OF RHEUMATOLOGY AND EUROPEAN LEAGUE AGAINST RHEUMATISM 2021 CLASSIFICATION CRITERIA FOR ANCA-ASSOCIATED VASCULITIS [GRANULOMATOSIS WITH POLYANGIITIS, MICROSCOPIC POLYANGIITIS, AND EOSINOPHILIC GRANULOMATOSIS WITH POLYANGIITIS]**

- 1. Detailed description of the research methods for the development of classification criteria for eosinophilic granulomatosis with polyangiitis, granulomatosis with polyangiitis, and microscopic polyangiitis**
- 2. Diagnosis and Classification of Vasculitis Study Case Report Form**
- 3. Diagnosis and Classification of Vasculitis Study Sites and Investigators**
- 4. Diagnosis and Classification of Vasculitis Study Sites/Investigators Characteristics**
- 5. Study Participant Details**
- 6. Final candidate items used within each regression analysis to derive classification criteria for granulomatosis with polyangiitis, microscopic polyangiitis, and eosinophilic granulomatosis with polyangiitis**
- 7. Expert reviewer characteristics**
- 8. Flow chart of expert review process to create the Diagnosis and Classification of Vasculitis Study dataset for ANCA-associated vasculitis**
- 9. Results of regression analysis for each type of ANCA-associated vasculitis**
- 10. Data-driven and clinically-selected models for each type of ANCA-associated vasculitis with associated risk scored based off beta coefficient weighting**
- 11. Performance characteristics of a points-based risk score for each type of ANCA-associated vasculitis with different thresholds**
- 12. Discrimination curves for the classification criteria for each type of ANCA-associated vasculitis**

## ACR-EULAR Classification Criteria for ANCA-Associated Vasculitis

**Supplementary Materials 1. Detailed description of the research methods for the development of classification criteria for eosinophilic granulomatosis with polyangiitis, granulomatosis with polyangiitis, and microscopic polyangiitis**

An international Steering Committee comprised of clinician investigators with expertise in vasculitis, statisticians, and data managers was established to oversee the overall DCVAS project. A five-stage process was used to derive each of the classification criteria for granulomatosis with polyangiitis (GPA), eosinophilic granulomatosis with polyangiitis (EGPA), and microscopic polyangiitis (MPA). An overview of each stage of the methodology is presented in the figure below.

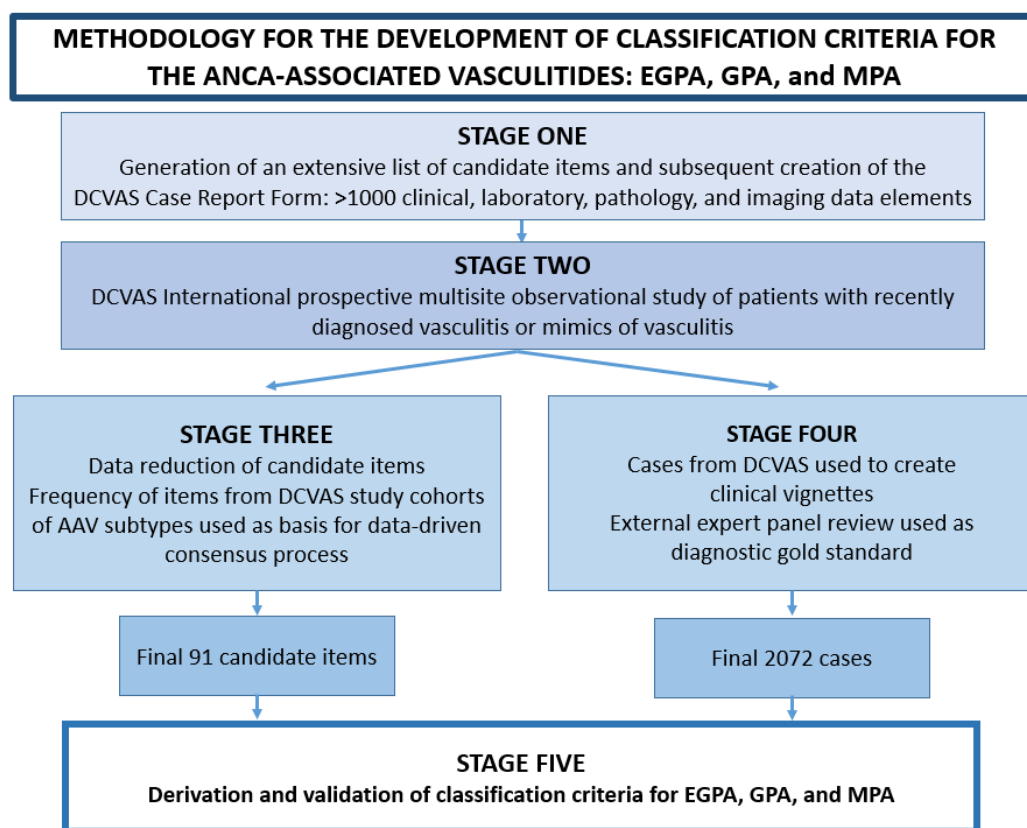

EGPA: eosinophilic granulomatosis with polyangiitis; GPA: granulomatosis with polyangiitis;  
MPA: microscopic polyangiitis

Full details of each stage in the process are described below.

## ACR-EULAR Classification Criteria for ANCA-Associated Vasculitis

**Stage One: Generation of candidate classification items for the systemic vasculitides**

Candidate items were generated by expert opinion including items from the 1990 ACR Classification Criteria, the 2012 Chapel Hill Nomenclature, and the major disease activity and damage indices for AAV (1-5). Items were categorized as demographic, symptoms, physician-observed findings, laboratory tests, diagnostic radiology, and biopsy results. Candidate items were reviewed and discussed at a major international vasculitis conference, and nominal group technique was used to modify the potential list of items with input from vasculitis experts across a range of specialties. The full list of items was then reviewed by the Steering Committee to address potential omissions or redundancy in the list with appropriate revisions made. A list of data elements was finalized by the Steering Committee for use in prospective data collection in Stage Two. The resulting DCVAS case report form (CRF) is shown in **Supplementary Materials 2**.

**Stage Two: DCVAS prospective observational study**

The DCVAS study is an international prospective multisite observational study of patients recently-diagnosed with vasculitis or mimics of vasculitis (6).

The University of Oxford sponsored the study, and ethics approval was given by the UK Berkshire Research Ethics Committee (reference 10/H0505/19) on May 7, 2010. The study was performed in accordance with the 1964 Declaration of Helsinki, ethical approval was obtained by national and local ethics committees in accordance with national legislation.

Site Selection

A wide range of sites were targeted for inclusion to ensure representation from different geographical regions, clinical specialties, and types of sites (including both academic and non-academic clinical practices). To increase the number and types of study sites, the DCVAS study was promoted through national and international presentations, and the DCVAS website (**Supplementary Materials 3 & 4**).

Patient Recruitment*Inclusion criteria for the DCVAS study:*

1) Patients aged  $\geq 18$  years; 2) Ability to give informed consent or consent via an appropriate surrogate; 3) i) Diagnosis as made by the submitting clinician within the previous two years of GPA, MPA, EGPA, other AAV, giant cell arteritis, anti-glomerular basement membrane disease, cryoglobulinemic vasculitis, Behçet's disease, primary central nervous system vasculitis, IgA vasculitis, isolated aortitis, other large-vessel vasculitis, or a diagnosis within the previous five years of polyarteritis nodosa or Takayasu's arteritis; OR ii) Diagnosis as made by the submitting clinician within the previous two years of a condition which mimics systemic vasculitis, e.g., infection, tumor, other inflammatory conditions (see **Supplementary Materials 5** for the complete details of physician-submitted diagnoses). For patients enrolled six months after diagnosis, only patients for whom the submitting physician had complete records detailing symptoms present at the time of diagnosis were eligible for study inclusion.

## ACR-EULAR Classification Criteria for ANCA-Associated Vasculitis

*Exclusion criteria:*

1) Patients < 18 years of age; 2) Inability to provide informed consent.

*Submitting-Physician Diagnosis*

For patients with vasculitis who were enrolled in the DCVAS study within six months of the initial diagnosis, the submitting physician was asked to confirm the accuracy of the diagnosis at the six-month time point in a separate study form.

*Data Collection*

Paper and web-based versions of the CRF were used (**Supplementary Materials 2**). Data from patients with a working diagnosis of systemic vasculitis or mimics of systemic vasculitis were entered. The diagnosis and level of certainty for diagnosis was requested from the submitting physician at time of diagnosis and six months later. Data from all study participants was reviewed at a central location for completeness. Local investigators were contacted to resolve any data discrepancies.

***Stage Three: Refinement of candidate items specifically for ANCA-associated vasculitis***

The DCVAS CRF included > 1000 data elements. The final statistical analysis to create classification criteria for all subtypes of AAV, including GPA, required approximately 100 predictors to avoid over-fitting of the final model during regression analysis (7).

A data-driven process of reduction of the DCVAS initial items was used to retain candidate items of relevance to cases and comparators for AAV. Seven members of the DCVAS Steering Committee (PG, RL, PM, CP, RS, JR, RW) were split into groups of two to each review a different category of items in terms of frequency across all AAV subtypes, and assess clinical relevance: clinical features, laboratory results, pathology results, and imaging. Data on frequency of items was prepared for review from cases of GPA, MPA and EGPA (physician diagnosis) from the DCVAS dataset. Items were selected for exclusion if they had i) prevalence of <5% within the data set and/or ii) they were non-clinically relevant for classification criteria (e.g., related to infection, malignancy, or demography). Low-frequency items of clinical importance could be combined, when appropriate (for example the items for “fever”, “night sweats”, and “rigors”, see **Supplementary Materials 6** for single and composite items). Consensus was reached between the two independent Steering Committee members, who then presented and discussed the items for exclusion to reach agreement across the wider steering committee over the course of four teleconferences.

## ACR-EULAR Classification Criteria for ANCA-Associated Vasculitis

**Stage Four: Expert panel methodology to derive a gold standard-defined set of cases of ANCA-associated vasculitis**

An online independent Expert Review Process was used to avoid the circularity of applying a previously derived gold standard such as the 1990 ACR Criteria (8). Experts in vasculitis from a wide range of geographical locations and specialties reviewed all cases of vasculitis submitted (see **Supplementary Materials 7** for the expert reviewer characteristics). Fifty-five external expert reviewers reviewed approximately 50 cases each. Reviewers were blinded to the submitting physician's diagnosis.

Clinical vignettes of each case, including clinical, laboratory, imaging, and biopsy results were produced using data from the CRFs and presented in a standard clinical vignette form. All cases labeled GPA, MPA, EGPA, or a different form of small vessel vasculitis by the submitting physician were reviewed. To ensure a rigorous process, 10% of cases with a submitting physician diagnosis of polyarteritis nodosa, other small-vessel vasculitis, large-vessel vasculitis, or a condition mimicking vasculitis were also randomly included for expert review.

For each case vignette, the expert reviewer indicated:

- (i) whether or not the diagnosis was vasculitis
- (ii) which category of vasculitis was present, based on vessel size (small, medium, large, or not categorizable)
- (iii) if a type of vasculitis was chosen in (ii) then which subtype of vasculitis was present (for example, if AAV was selected, then a choice of GPA, MPA, EGPA, or uncertain sub-type was provided).

Reviewers were asked about their certainty for each of (i)-(iii) as follows: very certain, moderately certain, uncertain, or very uncertain.

A case was considered to be agreed in full if the Expert Reviewer's assessment matched the submitting physician's assessment at each level, with at least moderate certainty. Cases that were not agreed on expert review were submitted for a blinded second review by a member of the Steering Committee. If the Steering Committee member agreed with either the submitting physician's assessment or the initial expert reviewer with moderate certainty, then the case was agreed upon in full. Cases that were not agreed upon in full were rejected from further analysis. The panel review process was conducted in 2016 using all available data to date. Since study enrollment continued through 2017, additional cases of AAV were submitted to the DCVAS cohort that were not used for analysis.

A flow diagram depicting the results from the expert review process is provided in **Supplementary Materials 8**.

## ACR-EULAR Classification Criteria for ANCA-Associated Vasculitis

**Stage Five: Derivation and validation of the final classification criteria for the ANCA-associated vasculitides**

A similar process for the derivation of each of the three final classification criteria for GPA, MPA and EGPA was followed. There were two methodological differences between the three criteria due to a higher proportion of GPA cases available for analysis than the other two types of AAV (as expected in line with known prevalence of the individual subtypes of AAV).

All cases with small or medium vessel vasculitis agreed by the expert review process in Stage 4 were included within the derivation of the GPA classification criteria as either cases (GPA) or comparators (See Table 1 GPA manuscript for subdivision of comparators). For the derivation of the MPA and EGPA criteria, only a proportion of the available GPA cases were included within the comparator groups. This was to avoid over-representation of GPA cases within each comparator group due to higher overall prevalence in the DCVAS dataset. GPA cases were chosen randomly for inclusion as comparators for EGPA and MPA. Exact numbers are shown in Table 1 of each manuscript.

For the GPA criteria, due to a high availability of GPA cases, the development and validation sets were derived from the DCVAS dataset of approved cases (Stage 4) on an 80:20 basis in order to maximize descriptive power of the resultant criteria. In contrast, the derivation of the MPA and EGPA sets split the DCVAS dataset into development and validation sets on a 50:50 basis.

For each criteria, the cases were comprised of one of either GPA, EGPA or MPA cases depending on the criteria, and the comparators made up of the two other forms of AAV plus other small and medium vessel vasculitides (exact numbers given in Table 1 of each manuscript). This process resulted in the generation of a binary outcome (AAV type or comparators) and the following steps were then followed for each criteria using the same 91 candidate item predictors identified from Stage Three.

The candidate predictors from Stage Three were included in a logistic regression model. Fractional polynomial regression modeling was used to assess evidence of linearity with outcome for continuous predictor variables (9). Multiple imputation was used to overcome potential bias from missing data (10). Lasso (least absolute shrinkage and selection operator) logistic regression was used to identify predictors from the dataset and create a parsimonious model including only the most important predictors (7,11,12). To extract the non-zero coefficients and, therefore, the significant predictors, a single model was fitted and adjusted for all potential variables with a 10-fold cross-validation and the minimum average mean-squared error (**Supplementary Materials 9**).

For each criterion, an iterative process within the Steering Committee was followed, with the clinician researchers and expert biostatisticians working collaboratively, to ensure face and content validity and acceptability of the resultant criteria. Most items were excluded because they were not significant predictors within the final model, i.e they did not differentiate between cases and comparators (for example for GPA, “presence of cutaneous infarcts or purpura”, or “maximum ESR”). Some predictors were statistically significant (i.e.

## ACR-EULAR Classification Criteria for ANCA-Associated Vasculitis

$p < 0.05$ ) but were either redundant to other items in the final model or thought to be of low clinical significance (for example for GPA, “morning stiffness for >1 hour”, or “unspecified tissue inflammation on biopsy”). These items were then removed from the model with the reduced item model tested in turn for discrimination, area under the curve (AUC) sensitivity and specificity to check there was no reduction in predictive value of the model. In this way, the final criteria were based on the most parsimonious models available including only the most important predictors.

The final items in the model were formulated into a clinical risk-scoring tool with each factor assigned a weight based on its respective regression coefficient (13) (**Supplementary Materials 10**). A threshold was identified for classification, which best balanced sensitivity and specificity (**Supplementary Materials 11 & 12**).

**Sensitivity Analyses:**

Since the expert review could have resulted in the exclusion of cases which were less clear-cut to classify, the final classification criteria were applied to an unselected population of cases and comparators from the DCVAS dataset based on the submitting physician diagnosis. The *a priori* hypothesis of these analyses was that if the final criteria were fit for purpose, specificity should be unchanged but sensitivity should be reduced within the unselected population. Comparators used for the unselected population analysis were as follows:

- **Comparators for GPA analysis:** MPA (404, 19.9%), EGPA (315, 15.5%), AAV that could not be subtyped (59, 2.9%), non-AAV small-vessel vasculitis that could not be subtyped (171, 8.4%), anti-glomerular basement membrane disease (14, 0.6%), cryoglobulinemic vasculitis (46, 2.3%), IgA vasculitis (240, 11.8%), Behçet’s disease (151, 7.4%), primary central nervous system vasculitis (39, 1.9%), other forms of vasculitis that could not be subtyped (23, 1.1%), polyarteritis nodosa (130, 6.4%), giant cell arteritis (92, 4.5%), Takayasu’s arteritis (91, 4.5%), idiopathic aortitis (22, 1.1%), large-vessel vasculitis that could not be subtyped (52, 2.6%), and vasculitis mimics (179, 8.8%).
- **Comparators for EGPA analysis:** MPA (404, 15.8%), GPA (843, 33.0%), AAV that could not be subtyped (59, 2.3%), non-AAV small-vessel vasculitis that could not be subtyped (171, 6.7%), anti-glomerular basement membrane disease (14, 0.6%), CV (46, 1.8%), IgA vasculitis (240, 9.4%), Behçet’s disease (151, 5.9%), primary central nervous system vasculitis (39, 1.5%), other form of vasculitis that could not be subtyped (23, 0.9%), polyarteritis nodosa (130, 5.1%), giant cell arteritis (92, 3.6%), Takayasu’s arteritis (91, 3.6%), isolated aortitis (22, 0.9%), large-vessel vasculitis that could not be subtyped (52, 2.0%), and vasculitis mimics (179, 7.0%).
- **Comparators for MPA analysis:** EGPA (315, 12.7%), GPA (843, 34.2%), AAV that could not be subtyped (59, 2.40%), non-AAV small-vessel vasculitis that could not be subtyped (171, 6.9%), anti-glomerular basement membrane disease (14, 0.6%), cryoglobulinemic vasculitis (46, 1.9%), IgA vasculitis (240, 9.7%), Behçet’s disease (151, 6.1%), primary central nervous system vasculitis (39, 1.6%), other form of vasculitis that could not be subtyped (23, 0.9%), polyarteritis nodosa (130, 5.3%), giant cell arteritis (92, 3.7%), Takayasu’s arteritis (91, 3.7%), isolated aortitis (22, 0.9%), large-vessel vasculitis that could not be subtyped (52, 2.1%), and vasculitis mimics (179, 7.3%).

### ACR-EULAR Classification Criteria for ANCA-Associated Vasculitis

Comparisons were also made between the measurement properties of the new classification criteria for GPA and EGPA and the respective 1990 ACR Classification Criteria for GPA and EGPA using pooled data from the development and validation sets. These comparisons were not performed for MPA as there are no pre-existing classification criteria for this disease.

#### **Additional Acknowledgements:**

The DCVAS study recognizes the contributions of Joe Barrett, David T Gray, Marian Montgomery, Ann-Marie Morgan, and Joe Rosa from the Oxford study team for efforts to design and implement the DCVAS database and clinical vignettes/expert panel review, perform quality control of submitted data elements, and communicate with participating sites.



## ACR-EULAR Classification Criteria for ANCA-Associated Vasculitis

## REFERENCES

1. Fries JF, Hunder GG, Bloch DA, Michel BA, Arend WP, Calabrese LH, et al. The American College of Rheumatology 1990 criteria for the classification of vasculitis. Summary. *Arthritis Rheum* 1990;33:1135-6.
2. Bloch DA, Michel BA, Hunder GG, McShane DJ, Arend WP, Calabrese LH, et al. The American College of Rheumatology 1990 criteria for the classification of vasculitis. Patients and methods. *Arthritis Rheum* 1990;33:1068-73.
3. Leavitt RY, Fauci AS, Bloch DA, Michel BA, Hunder GG, Arend WP, et al. The American College of Rheumatology 1990 criteria for the classification of Wegener's granulomatosis. *Arthritis Rheum* 1990;33:1101-7.
4. Masi AT, Hunder GG, Lie JT, Michel BA, Bloch DA, Arend WP, et al. The American College of Rheumatology 1990 criteria for the classification of Churg-Strauss syndrome (allergic granulomatosis and angiitis). *Arthritis Rheum*. 1990;33(8):1094-100.
5. Jennette JC, Falk RJ, Bacon PA, Basu N, Cid MC, Ferrario F, et al. 2012 revised International Chapel Hill Consensus Conference Nomenclature of Vasculitides. *Arthritis Rheum* 2013;65:1-11.
6. Craven A, Robson J, Ponte C, Grayson PC, Suppiah R, Judge A, et al. ACR/EULAR-endorsed study to develop Diagnostic and Classification Criteria for Vasculitis (DCVAS). *Clin Exp Nephrol* 2013;17:619-21.
7. Pavlou M, Ambler G, Seaman SR, Guttman O, Elliott P, King M, et al. How to develop a more accurate risk prediction model when there are few events. *BMJ* 2015;351:h3868.
8. Bloch DA, Michel BA, Hunder GG, McShane DJ, Arend WP, Calabrese LH, et al. The American College of Rheumatology 1990 criteria for the classification of vasculitis. Patients and methods. *Arthritis Rheum* 1990;33:1068-73.
9. Royston P, Ambler G, Sauerbrei W. The use of fractional polynomials to model continuous risk variables in epidemiology. *Int J Epidemiol* 1999;28:964-74.
10. Janssen KJ, Donders AR, Harrell FE, Jr., Vergouwe Y, Chen Q, Grobbee DE, et al. Missing covariate data in medical research: to impute is better than to ignore. *J Clin Epidemiol* 2010;63:721-7.
11. Collins GS, Reitsma JB, Altman DG, Moons KG. Transparent Reporting of a multivariable prediction model for Individual Prognosis Or Diagnosis (TRIPOD). *Ann Intern Med* 2015;162:735-6.
12. Musoro JZ, Zwinderman AH, Puhan MA, ter Riet G, Geskus RB. Validation of prediction models based on lasso regression with multiply imputed data. *BMC Med Res Methodol* 2014;14:116.
13. Judge A, Javaid MK, Arden NK, Cushnaghan J, Reading I, Croft P, et al. Clinical tool to identify patients who are most likely to achieve long-term improvement in physical function after total hip arthroplasty. *Arthritis Care Res (Hoboken)* 2012;64:881-9.

ACR-EULAR Classification Criteria for ANCA-Associated Vasculitis

**Supplementary Materials 2. DCVAS Case Report Form**

**See separate PDF file titled “DCVAS Case Report Form”**

## ACR-EULAR Classification Criteria for ANCA-Associated Vasculitis

**Supplementary Materials 3: Diagnosis and Classification of Vasculitis Study (DCVAS)**  
**Sites and Investigators**

| Country        | Investigator                        | Participating Center                                                 |
|----------------|-------------------------------------|----------------------------------------------------------------------|
| Australia      | Paul Gatenby                        | ANU Medical Centre, Canberra                                         |
| Australia      | Catherine Hill                      | Central Adelaide Local Health Network: The Queen Elizabeth Hospital  |
| Australia      | Dwarakanathan Ranganathan           | Royal Brisbane and Women's Hospital                                  |
| Austria        | Andreas Kronbichler                 | Medical University Innsbruck                                         |
| Belgium        | Daniel Blockmans                    | University Hospitals Leuven                                          |
| Canada         | Lillian Barra                       | Lawson Health Research Institute, London, Ontario                    |
| Canada         | Simon Carette/<br>Christian Pagnoux | Mount Sinai Hospital, Toronto                                        |
| Canada         | Navjot Dhindsa                      | University of Manitoba, Winnipeg                                     |
| Canada         | Aurore Fifi-Mah                     | University of Calgary, Alberta                                       |
| Canada         | Nader Khalidi                       | St Joseph's Healthcare Hamilton, Ontario                             |
| Canada         | Patrick Liang                       | Sherbrooke University Hospital Centre                                |
| Canada         | Nataliya Milman                     | University of Ottawa                                                 |
| Canada         | Christian Pineau                    | McGill University                                                    |
| China          | Xinping Tian                        | Peking Union Medical College Hospital, Beijing                       |
| China          | Guochun Wang                        | China-Japan Friendship Hospital, Beijing                             |
| China          | Tian Wang                           | Anzhen Hospital, Capital Medical University                          |
| China          | Ming-hui Zhao                       | Peking University First Hospital                                     |
| Czech Republic | Vladimir Tesar                      | General University Hospital, Prague                                  |
| Denmark        | Bo Baslund                          | University Hospital, Copenhagen (Rigshospitalet)                     |
| Egypt          | Nevin Hammam                        | Assiut University                                                    |
| Egypt          | Amira Shahin                        | Cairo University                                                     |
| Finland        | Laura Pirila                        | Turku University Hospital, Finland                                   |
| Finland        | Jukka Putaala                       | Helsinki University Central Hospital                                 |
| Germany        | Bernhard Hellmich                   | Kreiskliniken Esslingen                                              |
| Germany        | Jörg Henes                          | Universitätsklinikum Tübingen                                        |
| Germany        | Peter Lamprecht                     | Klinikum Bad Bramstedt                                               |
| Germany        | Thomas Neumann                      | Universitätsklinikum Jena                                            |
| Germany        | Wolfgang Schmidt                    | Immanuel Krankenhaus Berlin                                          |
| Germany        | Cord Sunderkoetter                  | Universitätsklinikum Münster                                         |
| Hungary        | Zoltan Szekanecz                    | University of Debrecen Medical and Health Science Center             |
| India          | Debashish Danda                     | Christian Medical College & Hospital, Vellore                        |
| India          | Siddharth Das                       | Chatrapathi Shahuji Maharaj Medical Center, Lucknow (IP)             |
| India          | Rajiva Gupta                        | Medanta, Delhi                                                       |
| India          | Liza Rajasekhar                     | NIMS, Hyderabad                                                      |
| India          | Aman Sharma                         | Postgraduate Institute of Medical Education and Research, Chandigarh |
| India          | Shrikant Wagh                       | Jehangir Clinical Development Centre, Pune (IP)                      |

## ACR-EULAR Classification Criteria for ANCA-Associated Vasculitis

| Country     | Investigator                   | Participating Center                                                             |
|-------------|--------------------------------|----------------------------------------------------------------------------------|
| Ireland     | Michael Clarkson               | Cork University Hospital                                                         |
| Ireland     | Eamonn Molloy                  | St. Vincent's University Hospital, Dublin                                        |
| Italy       | Carlo Salvarani                | Santa Maria Nuova Hospital, Reggio Emilia                                        |
| Italy       | Franco Schiavon                | L'Azienda Ospedaliera of University of Padua                                     |
| Italy       | Enrico Tombetti                | Università Vita-Salute San Raffaele Milano                                       |
| Italy       | Augusto Vaglio                 | University of Parma                                                              |
| Japan       | Koichi Amano                   | Saitama Medical University                                                       |
| Japan       | Yoshihiro Arimura              | Kyorin University Hospital                                                       |
| Japan       | Hiroaki Dobashi                | Kagawa University Hospital                                                       |
| Japan       | Shouichi Fujimoto              | Miyazaki University Hospital (HUB)                                               |
| Japan       | Masayoshi Harigai/Fumio Hirano | Tokyo Medical and Dental University Hospital                                     |
| Japan       | Junichi Hirahashi              | University Tokyo Hospital                                                        |
| Japan       | Sakae Honma                    | Toho University Hospital                                                         |
| Japan       | Tamihiro Kawakami              | St. Marianna University Hospital Dermatology                                     |
| Japan       | Shigeto Kobayashi              | Juntendo University Koshigaya Hospital                                           |
| Japan       | Hajime Kono                    | Teikyo University                                                                |
| Japan       | Hirofumi Makino                | Okayama University Hospital                                                      |
| Japan       | Kazuo Matsui                   | Kameda Medical Centre, Kamogawa                                                  |
| Japan       | Eri Muso                       | Kitano Hospital                                                                  |
| Japan       | Kazuo Suzuki/Kei Ikeda         | Chiba University Hospital                                                        |
| Japan       | Tsutomu Takeuchi               | Keio University Hospital                                                         |
| Japan       | Tatsuo Tsukamoto               | Kyoto University Hospital                                                        |
| Japan       | Shunya Uchida                  | Teikyo University Hospital                                                       |
| Japan       | Takashi Wada                   | Kanazawa University Hospital                                                     |
| Japan       | Hidehiro Yamada                | St. Marianna University Hospital Internal Medicine                               |
| Japan       | Kunihiro Yamagata              | Tsukuba University Hospital                                                      |
| Japan       | Wako Yumura                    | IUHW Hospital (Jichi Medical University Hospital)                                |
| Malaysia    | Kan Sow Lai                    | Penang General Hospital                                                          |
| Mexico      | Luis Felipe Flores-Suarez      | Instituto Nacional de Enfermedades Respiratorias, Mexico City                    |
| Mexico      | Andrea Hinojosa                | Instituto Nacional de Ciencias Médicas y Nutrición Salvador Zubirán, Mexico City |
| Netherlands | Bram Rutgers                   | University Hospital Groningen                                                    |
| Netherlands | Paul-Peter Tak                 | Academic Medical Centre, University of Amsterdam                                 |
| New Zealand | Rebecca Grainger               | Wellington, Otago                                                                |
| New Zealand | Vicki Quincey                  | Waikato District Health Board                                                    |
| New Zealand | Lisa Stamp                     | University of Otago, Christchurch                                                |
| New Zealand | Ravi Suppiah                   | Auckland District Health Board                                                   |
| Norway      | Emilio Besada                  | Tromsø, Northern Norway                                                          |
| Norway      | Andreas Diamantopoulos         | Hospital of Southern Norway, Kristiansand                                        |

## ACR-EULAR Classification Criteria for ANCA-Associated Vasculitis

| Country           | Investigator                      | Participating Center                                            |
|-------------------|-----------------------------------|-----------------------------------------------------------------|
| Poland            | Jan Sznajd                        | University of Jagiellonian                                      |
| Portugal          | Elsa Azevedo                      | Centro Hospitalar de São João, Porto                            |
| Portugal          | Ruth Gerales                      | Hospital de Santa Maria, Lisbon                                 |
| Portugal          | Miguel Rodrigues                  | Hospital Garcia de Orta, Almada                                 |
| Portugal          | Ernestina Santos                  | Hospital Santo Antonio, Porto                                   |
| Republic of Korea | Yeong-Wook Song                   | Seoul National University Hospital                              |
| Russia            | Sergey Moiseev                    | First Moscow State Medical University                           |
| Slovenia          | Alojzija Hočevar                  | University Medical Centre Ljubljana                             |
| Spain             | Maria Cinta Cid                   | Hospital Clinic de Barcelona                                    |
| Spain             | Xavier Solanich Moreno            | Hospital de Bellvitge-Idibell                                   |
| Sri Lanka         | Inoshi Atukorala                  | University of Colombo                                           |
| Sweden            | Ewa Berglin                       | Umeå University Hospital                                        |
| Sweden            | Aladdin Mohammed                  | Lund-Malmö University                                           |
| Sweden            | Mårten Segelmark                  | Linköping University                                            |
| Switzerland       | Thomas Daikeler                   | University Hospital Basel                                       |
| Turkey            | Haner Direskeneli                 | Marmara University Medical School                               |
| Turkey            | Gulen Hatemi                      | Istanbul University, Cerrahpasa Medical School                  |
| Turkey            | Sevil Kamali                      | Istanbul University, Istanbul Medical School                    |
| Turkey            | Ömer Karadağ                      | Hacettepe University                                            |
| Turkey            | Seval Pehlevan                    | Fatih University Medical Faculty                                |
| United Kingdom    | Matthew Adler                     | Frimley Health NHS Foundation Trust, Wexham Park Hospital,      |
| United Kingdom    | Neil Basu                         | NHS Grampian, Aberdeen Royal Infirmary                          |
| United Kingdom    | Iain Bruce                        | Manchester University Hospitals NHS Foundation Trust            |
| United Kingdom    | Kuntal Chakravarty                | Barking, Havering and Redbridge University Hospitals NHS Trust  |
| United Kingdom    | Bhaskar Dasgupta                  | Southend University Hospital NHS Foundation Trust               |
| United Kingdom    | Oliver Flossmann                  | Royal Berkshire NHS Foundation Trust                            |
| United Kingdom    | Nagui Gendi                       | Basildon and Thurrock University Hospitals NHS Foundation Trust |
| United Kingdom    | Alaa Hassan                       | North Cumbria University Hospitals                              |
| United Kingdom    | Rachel Hoyles                     | Oxford University Hospitals NHS Foundation Trust                |
| United Kingdom    | David Jayne                       | Cambridge University Hospitals NHS Foundation Trust             |
| United Kingdom    | Colin Jones                       | York Teaching Hospitals NHS Foundation Trust                    |
| United Kingdom    | Rainer Klocke                     | The Dudley Group NHS Foundation Trust                           |
| United Kingdom    | Peter Lanyon                      | Nottingham University Hospitals NHS Trust                       |
| United Kingdom    | Cathy Laversuch                   | Taunton & Somerset NHS Foundation Trust, Musgrove Park Hospital |
| United Kingdom    | Raashid Luqmani/<br>Joanna Robson | Nuffield Orthopaedic Centre, Oxford                             |
| United Kingdom    | Malgorzata Magliano               | Buckinghamshire Healthcare NHS Trust                            |

## ACR-EULAR Classification Criteria for ANCA-Associated Vasculitis

| Country        | Investigator              | Participating Center                                                           |
|----------------|---------------------------|--------------------------------------------------------------------------------|
| United Kingdom | Justin Mason              | Imperial College Healthcare NHS Trust                                          |
| United Kingdom | Win Win Maw               | Mid Essex Hospital Services NHS Trust                                          |
| United Kingdom | Iain McInnes              | NHS Greater Glasgow & Clyde, Gartnavel Hospital & GRI                          |
| United Kingdom | John McLaren              | NHS Fife, Whyteman's Brae Hospital                                             |
| United Kingdom | Matthew Morgan            | University Hospitals Birmingham NHS Foundation Trust, Queen Elizabeth Hospital |
| United Kingdom | Ann Morgan                | Leeds Teaching Hospitals NHS Trust                                             |
| United Kingdom | Chetan Mukhtyar           | Norfolk and Norwich University Hospitals NHS Foundation Trust                  |
| United Kingdom | Edmond O'Riordan          | Salford Royal NHS Foundation Trust                                             |
| United Kingdom | Sanjeev Patel             | Epsom and St Helier University Hospitals NHS Trust                             |
| United Kingdom | Adrian Peall              | Wye Valley NHS Trust, Hereford County Hospital                                 |
| United Kingdom | Joanna Robson             | University Hospitals Bristol NHS Foundation Trust                              |
| United Kingdom | Srinivasan Venkatachalam  | The Royal Wolverhampton NHS Trust                                              |
| United Kingdom | Erin Vermaak / Ajit Menon | Staffordshire & Stoke on Trent Partnership NHS Trust, Haywood Hospital         |
| United Kingdom | Richard Watts             | East Suffolk and North Essex NHS Foundation Trust                              |
| United Kingdom | Chee-Seng Yee             | Doncaster and Bassetlaw Hospitals NHS Foundation Trust                         |
| United States  | Daniel Albert             | Dartmouth-Hitchcock Medical Center                                             |
| United States  | Leonard Calabrese         | Cleveland Clinic Foundation                                                    |
| United States  | Sharon Chung              | University of California, San Francisco                                        |
| United States  | Lindsay Forbess           | Cedars-Sinai Medical Center                                                    |
| United States  | Angelo Gaffo              | University of Alabama at Birmingham                                            |
| United States  | Ora Gewurz-Singer         | University of Michigan                                                         |
| United States  | Peter Grayson             | Boston University School of Medicine                                           |
| United States  | Kimberly Liang            | University of Pittsburgh                                                       |
| United States  | Eric Matteson             | Mayo Clinic                                                                    |
| United States  | Peter A. Merkel           | University of Pennsylvania                                                     |
| United States  | Jason Springer            | University of Kansas Medical Center Research Institute                         |
| United States  | Antoine Sreih             | Rush University Medical Center                                                 |

## ACR-EULAR Classification Criteria for ANCA-Associated Vasculitis

## Supplementary Materials 4. Diagnosis and Classification of Vasculitis Study Sites and Investigators' Characteristics

| Characteristics                      | N=136        | Characteristics                    | N=136        | Characteristics                                                         | N=136 (%)    |
|--------------------------------------|--------------|------------------------------------|--------------|-------------------------------------------------------------------------|--------------|
| <b>Country</b>                       |              | <b>Country</b>                     |              | <b>Specialty</b>                                                        |              |
| Australia                            | 3            | Mexico                             | 2            | Rheumatology                                                            | 99 (72.8)    |
| Austria                              | 1            | Netherlands                        | 2            | Nephrology                                                              | 21 (15.4)    |
| Belgium                              | 1            | New Zealand                        | 4            | Neurology                                                               | 5 (3.7)      |
| Canada                               | 8            | Norway                             | 2            | Internal Medicine                                                       | 4 (2.9)      |
| China                                | 4            | Poland                             | 1            | Immunology                                                              | 4 (2.9)      |
| Czech Republic                       | 1            | Portugal                           | 4            | Dermatology                                                             | 2 (1.5)      |
| Denmark                              | 1            | Republic of Korea                  | 1            | Respiratory                                                             | 1 (0.7)      |
| Egypt                                | 2            | Russia                             | 1            |                                                                         |              |
| Finland                              | 2            | Slovenia                           | 1            | <b>Number of patients with ANCA-associated vasculitis seen annually</b> |              |
| Germany                              | 6            | Spain                              | 2            |                                                                         |              |
| Hungary                              | 1            | Sri Lanka                          | 1            | 0-10                                                                    | 1 (0.7)      |
| India                                | 6            | Sweden                             | 3            | 11-20                                                                   | 3 (2.2)      |
| Ireland                              | 2            | Switzerland                        | 1            | 21-50                                                                   | 20 (14.7)    |
| Italy                                | 4            | Turkey                             | 5            | 51-100                                                                  | 22 (16.2)    |
| Japan                                | 20           | United Kingdom                     | 31           | >100                                                                    | 60 (44.1)    |
| Malaysia                             | 1            | United States of America           | 12           | Unknown                                                                 | 30 (22.1)    |
|                                      |              |                                    |              |                                                                         |              |
| <b>Background</b>                    | <b>N (%)</b> | <b>Sex of primary investigator</b> | <b>N (%)</b> | <b>Years within specialty</b>                                           | <b>N (%)</b> |
| Academic hospital/<br>Medical school | 89 (65.4)    | Male                               | 99 (72.8)    | 0-5                                                                     | 0            |
| Non-academic hospital                | 17 (12.5)    | Female                             | 37 (27.2)    | 6-10                                                                    | 15 (11.0)    |
| Unknown                              | 30 (22.1)    |                                    |              | 11-15                                                                   | 22 (16.2)    |
|                                      |              |                                    |              | 16-20                                                                   | 21 (15.4)    |
|                                      |              |                                    |              | >20                                                                     | 48 (35.3)    |
|                                      |              |                                    |              | Unknown                                                                 | 30 (22.1)    |
|                                      |              |                                    |              |                                                                         |              |
|                                      |              |                                    |              |                                                                         |              |
|                                      |              |                                    |              |                                                                         |              |

## ACR-EULAR Classification Criteria for ANCA-Associated Vasculitis

## Supplementary Materials 5. Study Participant Details

## 5a. Patient recruitment by region

|               | Total Sites | Total Patients Recruited | % Patients Recruited |
|---------------|-------------|--------------------------|----------------------|
| Europe        | 71          | 4107                     | 59%                  |
| North America | 22          | 1497                     | 21%                  |
| Other Regions | 43          | 1387                     | 20%                  |
| <b>TOTAL</b>  | <b>136</b>  | <b>6991</b>              |                      |

## 5B. Physician-submitted diagnosis for the DCVAS cohort

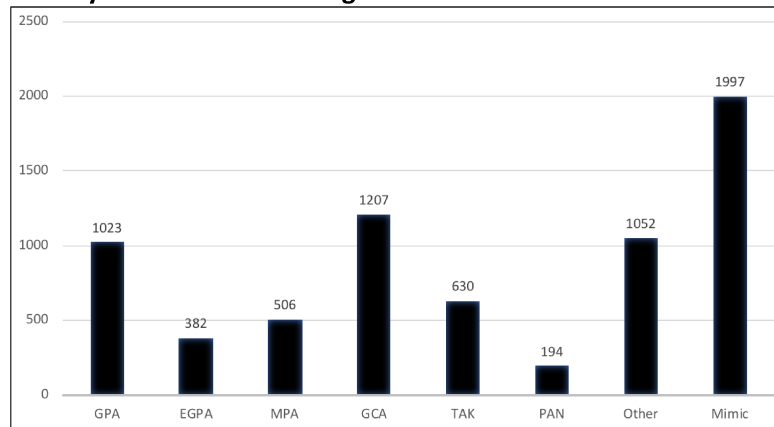

GPA = granulomatosis with polyangiitis  
 EGPA = eosinophilic granulomatosis with polyangiitis  
 MPA = microscopic polyangiitis  
 GCA = giant cell arteritis  
 TAK = Takayasu's arteritis  
 PAN = polyarteritis nodosa  
 Other = other form of vasculitis  
 Mimic = other condition that mimics vasculitis

## 5c. Physician-submitted diagnosis for patients with "other forms of vasculitis"

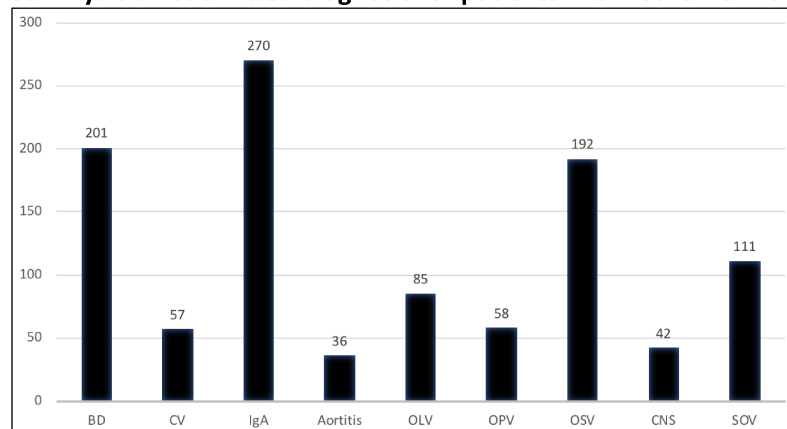

BD = Behcet's disease  
 CV = cryoglobulinemic vasculitis  
 IgA = IgA vasculitis  
 Aortitis = isolated aortitis  
 OLV = other form of large-vessel vasculitis  
 OPV = other form of primary vasculitis  
 OSV = other form of small-vessel vasculitis  
 CNS = primary central nervous system vasculitis  
 SOV = single organ vasculitis



## ACR-EULAR Classification Criteria for ANCA-Associated Vasculitis

**Supplementary Materials 6. Final candidate items used within each regression analysis to derive classification criteria for granulomatosis with polyangiitis, microscopic polyangiitis, and eosinophilic granulomatosis with polyangiitis**

Significant differences in frequencies of item between the specific types of ANCA-associated vasculitis [granulomatosis with polyangiitis, microscopic polyangiitis, and eosinophilic granulomatosis with polyangiitis] and comparators: \*p<0.05, \*\*p<0.01

| Item            | Description                                        | Composite Items | GPA<br>N= 724 | MPA<br>N=291  | EGPA<br>N=226 |
|-----------------|----------------------------------------------------|-----------------|---------------|---------------|---------------|
| Sex             | Sex (female)                                       |                 | 340 (47.0)*   | 164 (56.4)*   | 113 (50.0)    |
| Age             | Age (years)                                        |                 | 56.6 (16.2)*  | 65.5 (13.2)** | 52.9 (14.4)*  |
| Smoke1          | Smoking status (current)                           |                 | 77 (10.6)     | 29 (10.0)     | 4 (1.8)**     |
| <b>CLINICAL</b> |                                                    |                 |               |               |               |
| Bron3           | Bronchitic changes or mucosal injury               |                 | 52 (7.2)      | 6 (2.1)       | 16 (7.1)*     |
| Bron6           | Blood stained bronchoalveolar lavage               |                 | 32 (4.4)*     | 13 (4.5)      | 3 (1.3)       |
| CPCF2           | Crackles / râles on auscultation                   |                 | 109 (15.1)    | 87 (29.9)**   | 36 (15.9)     |
| CPCF4           | Respiratory compromise requiring oxygen            |                 | 58 (8.0)      | 39 (13.4)*    | 23 (10.2)     |
| CPSym1          | Dyspnea / Shortness of Breath                      |                 | 317 (43.8)*   | 124 (42.6)    | 155 (68.6)**  |
| CPSym2          | Non-productive cough                               |                 | 169 (23.3)*   | 64 (22.0)     | 75 (33.2)**   |
| CPSym3          | Productive cough with purulent sputum              |                 | 83 (11.5)     | 39 (13.4)     | 43 (19.0)**   |
| CPSym4          | Minor hemoptysis                                   |                 | 135 (18.6)**  | 39 (13.4)     | 18 (8.0)      |
| CVCF5           | Arrhythmia                                         |                 | 10 (1.4)      | 5 (1.7)       | 14 (6.2)**    |
| CVSym1          | Angina / ischemic cardiac pain                     |                 | 7 ( 1.0)*     | 4 (1.4)       | 16 (7.1)**    |
| entcf3entcf4    | Conductive hearing loss/sensorineural hearing loss | Y               | 172 (23.8)    | 12 (4.1)**    | 21 (9.3)      |
| ENTCF5          | Nasal polyps                                       |                 | 35 ( 4.8)**   | 4 (1.4)**     | 84 (37.2)**   |
| ENTSym5         | Non-blood stained nasal discharge                  |                 | 139 (19.2)**  | 17 (5.8)*     | 45 (19.9)**   |
| ENTSym7         | Loss of smell (anosmia)                            |                 | 74 (10.2)**   | 1 (0.3)       | 32 (14.2)**   |
| EyeCF3          | Conjunctivitis                                     |                 | 47 (6.5)**    | 4 (1.4)       | 2 (0.9)       |
| GenSym3         | Fatigue                                            |                 | 411 (56.8)    | 208 (71.5)**  | 139 (61.5)*   |
| GeUrSym1        | Macroscopic hematuria (blood visible in urine)     |                 | 25 (3.5)*     | 31 (10.7)**   | 2 (0.9)*      |
| GISym1          | Abdominal pain (any)                               |                 | 64 (8.8)**    | 27 (9.3)*     | 42 (18.6)     |

## ACR-EULAR Classification Criteria for ANCA-Associated Vasculitis

| Item                         | Description                                                                                                                             | Composite Items | GPA<br>N= 724 | MPA<br>N=291 | EGPA<br>N=226 |
|------------------------------|-----------------------------------------------------------------------------------------------------------------------------------------|-----------------|---------------|--------------|---------------|
| Lung4                        | Reduced DLCO or KCO                                                                                                                     |                 | 40 ( 5.5)     | 33 (11.3)**  | 15 (6.6)      |
| MskCF2                       | Muscle tenderness                                                                                                                       |                 | 36 (5.0)      | 20 (6.9)     | 23 (10.2)*    |
| MskCF3                       | Muscle weakness                                                                                                                         |                 | 36 (5.0)*     | 32 (11.0)*   | 30 (13.3)*    |
| MskSym6                      | Myalgia (muscle pain) or muscle cramps                                                                                                  |                 | 177 (24.4)    | 65 (22.3)    | 72 (31.9)*    |
| SknCF3                       | Maculopapular or papular rash                                                                                                           |                 | 48 (6.6)*     | 18 (6.2)     | 30 (13.3)*    |
| SknCF10                      | Ulcer                                                                                                                                   |                 | 32 (4.4)*     | 4 (1.4)**    | 8 (3.5)       |
| SknSym2                      | Painful skin lesions of any type                                                                                                        |                 | 63 (8.7)*     | 11 (3.8)**   | 23 (10.2)     |
| VMDMeds6                     | Leukotriene antagonist                                                                                                                  |                 | 2 (0.3)**     | 0 (0)*       | 29 (12.8)**   |
| Bron5CPSym5Lung5             | Evidence of alveolar hemorrhage/major hemoptysis/increased KCO                                                                          | Y               | 88 (12.2)**   | 35 (12.0)*   | 4 (1.8)**     |
| bron8entcf1entcf8entcf2      | Endobronchial involvement/inflamed ear or nose cartilage/hoarse voice stridor/saddle nose deformity                                     | Y               | 157 (21.7)**  | 6 (2.1)**    | 13 (5.8)      |
| CVCF2CVCF3                   | Congestive cardiac failure/cardiomyopathy                                                                                               | Y               | 7 (1.0)**     | 13 (4.5)     | 38 (16.8)**   |
| entcf6entsym6entsym4entCF7   | Bloody nasal discharge/nasal ulcers, mucosal abnormalities, crusting/sino nasal congestion or blockage/nasal septal defect, perforation | Y               | 527 (72.8)**  | 32 (11.0)**  | 124 (54.9)**  |
| eyecf5eyecf6eyecf7           | Keratitis (inflammation of the cornea)/scleritis or episcleritis/uveitis                                                                | Y               | 103 (14.2)**  | 6 (2.1)**    | 2 (0.9)**     |
| gencf6gensym4gensym5         | Fever $\geq 38^{\circ}\text{C}$ ( $\geq 100.4\text{F}$ )/night sweats/rigors                                                            | Y               | 355 (49.0)**  | 116 (39.9)   | 85 (36.3)     |
| GenCFWt2or3                  | Weight loss $\geq 2$ -5kg/weight loss $\geq 5$ Kg                                                                                       | Y               | 271 (37.4)*   | 114 (39.2)*  | 82 (36.3)     |
| lung3cpcf3                   | Obstructive airways disease/wheeze                                                                                                      | Y               | 67 (9.3)**    | 18 (6.2)**   | 148 (65.5)**  |
| mskcf1msksym1                | Swollen or inflamed joint(s)/arthralgia                                                                                                 | Y               | 406 (56.1)**  | 82 (28.2)**  | 82 (36.3)     |
| msksym2msksym3msksym4msksym5 | Morning stiffness $\geq 1$ hour in any of neck/torso/shoulders/arms/hips/thighs                                                         | Y               | 127 (17.5)**  | 25 (8.60)    | 15 (6.6)      |
| NeurCF10                     | Sensory neuropathy (not due to radiculopathy)                                                                                           |                 | 96 (13.3)**   | 50 (17.2)    | 84 (37.2)**   |
| neurcf6neurcf8               | Mononeuritis multiplex/motor neuropathy (not due to radiculopathy)                                                                      | Y               | 79 (10.9)**   | 44 (15.1)*   | 108 (47.8)**  |
| SknCF1SknCF2SknCF9           | Cutaneous infarct/petechiae or purpura/splinter hemorrhage                                                                              | Y               | 130 (18.0)*   | 26 (8.9)**   | 53 (23.5)     |
| gisym3gisym6                 | Diarrhea/bloody diarrhea                                                                                                                | Y               | 33 (4.6)**    | 26 (8.9)**   | 26 (11.5)     |

## ACR-EULAR Classification Criteria for ANCA-Associated Vasculitis

| Item              | Description                                                                 | Composite Items | GPA<br>N= 724  | MPA<br>N=291    | EGPA<br>N=226 |
|-------------------|-----------------------------------------------------------------------------|-----------------|----------------|-----------------|---------------|
| <b>LABORATORY</b> |                                                                             |                 |                |                 |               |
| TstHaem8_cat      | Maximum eosinophil count (x10 <sup>9</sup> /L) category >=1                 |                 | 0.08 (0.27)**  | 15 (5.2)**      | 206 (91.2)**  |
| TstChem1dn        | Maximum CRP (mg/L) (range)                                                  |                 | 97.6 (103.5)** | 94.6 (151.6)*   | 67.0 (69.3)*  |
| TstChem6dn        | Maximum creatinine - μmol/L (range)                                         |                 | 168.3 (185.2)  | 336.7 (302.7)** | 85.3 (53.6)** |
| Tsthaem9dn        | Maximum ESR (mm/hr) (range)                                                 |                 | 66.3 (35.0)**  | 74.4 (36.5)**   | 47.1 (30.2)** |
| TstHaem1          | Significant anemia (Hb <10g/dL)                                             |                 | 250 (34.5)     | 187 (64.3)**    | 27 (11.9)**   |
| TstHaem3          | Significant thrombocythemia (platelets > 500 x 10 <sup>9</sup> /L)          |                 | 170 (23.5)**   | 42 (14.4)       | 34 (15.0)     |
| TstHaem5          | Significant elevation of WBC (total WBC > 15 x 10 <sup>9</sup> /L)          |                 | 180 (24.9)     | 65 (22.3)       | 115 (50.9)**  |
| TstHaem7          | Significant neutrophilia (PMN > 10 x 10 <sup>9</sup> /L)                    |                 | 200 (27.6)*    | 80 (27.5)*      | 52 (23.0)     |
| TstChem3          | AST(SGOT) or ALT(SGPT)>2 upper limit normal                                 |                 | 48 (6.6)       | 8 (2.7)*        | 21 (9.3)*     |
| TstChem4          | Alkaline phosphatase >2x upper limit of normal                              |                 | 44 (6.1)       | 14 (4.8)        | 17 (7.5)      |
| TstChem8          | Albumin below 30g/L                                                         |                 | 168 (23.2)     | 125 (43.0)**    | 35 (15.5)*    |
| tstur1stur5       | Protein on urine dipstick* or 24 hour protein                               |                 | 418 (57.7)*    | 240 (82.5)**    | 60 (26.5)**   |
| TstUr2            | Blood on urine dipstick*                                                    |                 | 436 (60.2)**   | 252 (86.6)**    | 54 (23.9)**   |
| TstUr3            | Leucocytes or nitrites on urine dipstick*                                   |                 | 161 (85.1)     | 103 (35.4)**    | 26 (11.5)**   |
| TstUr4            | Red cell casts in urine                                                     |                 | 136 (18.8)     | 99 (34.0)**     | 10 (4.4)**    |
| TstCC1            | Serum cryoglobulins present                                                 |                 | 3 (0.4)**      | 7 (2.4)*        | 8 (3.5)       |
| TstAA1=1          | cANCA on immunofluorescence present                                         |                 | 531 (73.3)**   | 11 (3.8)**      | 17 (7.5)**    |
| TstAA3=1          | PR3 ANCA (ELISA) present                                                    |                 | 595 (82.2)**   | 6 (2.1)**       | 7 (3.1)**     |
| TstAA2=1          | pANCA on immunofluorescence present                                         |                 | 71 (9.8)**     | 236 (81.1)**    | 83 (36.7)     |
| TstAA4=1          | MPO ANCA (ELISA) present                                                    |                 | 59 (8.1)**     | 279 (95.9)**    | 98 (43.3)     |
| TstAA5            | Other ANCA by immunofluorescence                                            |                 | 13 (1.8)       | 3 (1.0)         | 6 (2.7)       |
| TstAA7            | Rheumatoid factor present                                                   |                 | 161 (22.2)     | 60 (20.6)       | 62 (27.4)*    |
| ancagr6           | cANCA or PR3 (composite to replace individual items TstAA1 and TstAA3)      | Y               | 616 (85.1)**   | 12 (4.1)**      | 21 (9.3)**    |
| ancagr7           | pANCA or MPO (composite item to replace individual items TstAA2 and TstAA4) | Y               | 84 (11.6)**    | 284 (97.6)**    | 107 (47.2)*   |

## ACR-EULAR Classification Criteria for ANCA-Associated Vasculitis

| Item           | Description                                                                                                                                                                        | Composite Items | GPA<br>N= 724 | MPA<br>N=291 | EGPA<br>N=226 |
|----------------|------------------------------------------------------------------------------------------------------------------------------------------------------------------------------------|-----------------|---------------|--------------|---------------|
| <b>IMAGING</b> |                                                                                                                                                                                    |                 |               |              |               |
| imag1          | Imaging of the chest/lungs with nodules OR mass/tumor OR cavitation                                                                                                                | Y               | 263 (36.3)**  | 31 (10.7)*   | 31 (13.7)     |
| imag2p1        | Imaging of the chest/lungs with hemorrhage OR infiltrates OR consolidation OR ground glass changes                                                                                 | Y               | 203 (28.0)**  | 67 (23.0)    | 73 (32.3)**   |
| imag2p3        | Imaging of the chest/lungs with hemorrhage                                                                                                                                         | Y               | 59 (8.1)**    | 22 (7.6)*    | 1 (0.4)*      |
| imag3          | Imaging of the pleura/chest with effusion                                                                                                                                          | Y               | 68 (9.4)      | 38 (13.1)    | 27 (11.9)     |
| imag4          | Imaging of the chest/lungs with fibrosis OR ILD                                                                                                                                    | Y               | 15 (2.1)**    | 67 (23.0)**  | 16 (7.1)      |
| imag5          | Imaging of the trachea/epiglottis with stenosis OR inflammation OR ulceration                                                                                                      | Y               | 9 (1.2)       | 0 (0)        | 0 (0)         |
| imag6          | Imaging of the nasal/paranasal sinuses with inflammation OR effusion OR consolidation OR wall thickness OR mastoiditis                                                             | Y               | 212 (29.3)**  | 5 (1.7)**    | 64 (28.3)**   |
| imag7          | Imaging of the nasal/paranasal sinuses with (deviated septum OR bony destruction OR septal perforation)                                                                            | Y               | 41 (5.7)**    | 0 (0)*       | 2 (0.9)       |
| imag8          | Imaging of the nasal/paranasal sinuses with polyps                                                                                                                                 | Y               | 17 (2.3)      | 0 (0.0)*     | 14 (6.2)**    |
| imag9          | Imaging of the orbital wall with mass/tumor OR inflammation                                                                                                                        | Y               | 13 (1.8)*     | 1 (0.3)      | 2 (0.9)       |
| imag10         | Imaging of the heart/cardiac muscle with EF<50% OR myocarditis OR cardiomyopathy OR cardiomyopathy OR hypokinesis OR akinesis OR MRI of the heart/cardiac muscle with inflammation | Y               | 7 (1.0)**     | 6 (2.10)     | 38 (16.8)**   |

## ACR-EULAR Classification Criteria for ANCA-Associated Vasculitis

| Item          | Description                                                                                                                 | Composite Items | GPA<br>N= 724 | MPA<br>N=291 | EGPA<br>N=226 |
|---------------|-----------------------------------------------------------------------------------------------------------------------------|-----------------|---------------|--------------|---------------|
| <b>BIOPSY</b> |                                                                                                                             |                 |               |              |               |
| biop1         | Pauci-immune glomerulonephritis                                                                                             |                 | 201 (27.8)*   | 141 (48.5)** | 11 (4.9)**    |
| biop2         | Necrotizing arteritis +/- fibrinoid necrosis                                                                                | Y               | 82 (11.3)     | 40 (13.7)    | 15 (6.6)*     |
| biop3         | Perivascular infiltrates or perivascular inflammation (combined item)                                                       | Y               | 17 ( 2.3)     | 6 (2.1)      | 10 (4.4)      |
| biop4         | Prominent neutrophils in vasculitis                                                                                         |                 | 26 ( 3.6)     | 3 (1.0)***   | 3 (1.3)*      |
| biop5         | Absence or paucity of immune complex deposition vessels other than glomeruli                                                |                 | 16 ( 2.2)     | 16 (5.5)***  | 5 (2.2)       |
| biop7         | Prominent eosinophils in vasculitis                                                                                         |                 | 5 ( 0.7)**    | 1 (0.3)**    | 42 (18.6)**   |
| biop8         | Predominant mononuclear leucocytes in vasculitis                                                                            |                 | 11 ( 1.5)     | 10 (3.4)     | 2 (0.9)       |
| biop9         | Anti-GBM staining on immunofluorescence                                                                                     |                 | 0 (0)         | 0 (0)        | 0 (0)         |
| biop10        | Immune complex glomerulonephritis                                                                                           |                 | 3 (0.4)       | 4 (1.4)      | 0 (0)         |
| biop12        | Immune complex deposition in vessels other than glomeruli with prominent IgA/IgA dominant immune complex glomerulonephritis | Y               | 6 (0.8)**     | 1 (0.3)**    | 0 (0)         |
| biop13        | Necrotizing or leucocytoclastic arteriolitis/venulitis/leucocytoclastic vasculitis                                          | Y               | 48 (6.6)*     | 11 (3.8)**   | 17 (7.5)      |
| biop14        | Extravascular eosinophil predominant inflammation/increased eosinophils in bone marrow                                      | Y               | 9 (1.2)**     | 1 (0.3)**    | 47 (20.8)**   |
| biop6biop15   | Granuloma/extravascular granulomatous inflammation/giant cells                                                              | Y               | 160 (22.1)**  | 7 (2.4)**    | 13 (5.8)      |
| biop16        | Unspecified tissue inflammation/extravascular non-granulomatous inflammation                                                | Y               | 147 (20.3)**  | 20 (6.9)*    | 34 (15.0)     |

## ACR-EULAR Classification Criteria for ANCA-Associated Vasculitis

## Supplementary Materials 7A. Expert Reviewer Characteristics

| Characteristics          | N=55 (%)  | Characteristics                                              | N=55 (%)  |
|--------------------------|-----------|--------------------------------------------------------------|-----------|
| <b>Country</b>           |           | <b>Specialty</b>                                             |           |
| Australia                | 1 (1.8)   | Rheumatology                                                 | 33 (60.0) |
| Canada                   | 3 (5.5)   | Nephrology                                                   | 11 (20.0) |
| Czech Republic           | 2 (3.6)   | Internal Medicine                                            | 4 (7.3)   |
| Denmark                  | 1 (1.8)   | Immunology                                                   | 3 (5.5)   |
| Egypt                    | 1 (1.8)   | Dermatology                                                  | 2 (3.6)   |
| France                   | 1 (1.8)   | Neurology                                                    | 1 (1.8)   |
| Germany                  | 7 (12.7)  | Pathology                                                    | 1 (1.8)   |
| India                    | 2 (3.6)   |                                                              |           |
| Ireland                  | 2 (3.6)   | <b>Number of patients with AAV<br/>seen at site per year</b> |           |
| Italy                    | 3 (5.5)   | >50                                                          | 32 (58.2) |
| Japan                    | 2 (3.6)   | 21-50                                                        | 11 (20.0) |
| Mexico                   | 2 (3.6)   | 6-20                                                         | 11 (20.0) |
| Netherlands              | 2 (3.6)   | Unknown                                                      | 1         |
| New Zealand              | 1 (1.8)   |                                                              |           |
| Portugal                 | 2 (3.6)   | <b>Years in specialty</b>                                    |           |
| Russia                   | 2 (3.6)   | 0-5                                                          | 2 (3.6)   |
| Slovenia                 | 1 (1.8)   | 6-10                                                         | 11 (20.0) |
| Spain                    | 1 (1.8)   | 11-15                                                        | 13 (23.6) |
| Switzerland              | 2 (3.6)   | 16-20                                                        | 9 (16.4)  |
| Turkey                   | 2 (3.6)   | >20                                                          | 19 (34.5) |
| United Kingdom           | 6 (10.9)  | Unknown                                                      | 1         |
| United States of America | 9 (16.4)  |                                                              |           |
|                          |           |                                                              |           |
| <b>Background</b>        |           | <b>Sex</b>                                                   |           |
| Clinician                | 11 (20.0) | Male                                                         | 38 (69.1) |
| Clinician and researcher | 44 (80.0) | Female                                                       | 17 (30.9) |

## ACR-EULAR Classification Criteria for ANCA-Associated Vasculitis

**Supplementary Materials 7B. Names of the Expert Reviewers**

|                            |                    |                    |                    |
|----------------------------|--------------------|--------------------|--------------------|
| Alba, Marco                | Gewurz-Singer, Ora | Khalidi, Nader     | Quincey, Vicki     |
| Barra, Lillian             | Guillevin, Loïc    | Lamprecht, Peter   | Rajasekhar, Liza   |
| Baslund, Bo                | Hammam, Nevin      | Langford, Carol    | Salama, Alan       |
| Basu, Neil                 | Hauser, Thomas     | Little, Mark       | Salvarani, Carlo   |
| Brown, Nina                | Hellmich, Bernhard | Macieira, Carla    | Schmidt, Wolfgang  |
| Cid, Maria                 | Henes, Jörg        | Matsui, Kazuo      | Sharma, Aman       |
| Daikeler, Thomas           | Hinojosa, Andrea   | Matteson, Eric     | Smith, Rona        |
| Direskeneli, Haner         | Hočevár, Alojzija  | Micheletti, Robert | Springer, Jason    |
| Emmi, Giamoco              | Holle, Julia       | Milman, Nataliya   | Sunderkötter, Cord |
| Flores-Suárez, Luis Felipe | Hruskova, Zdenka   | Moiseev, Sergey    | Sznajd, Jan        |
| Fujimoto, Shouichi         | Jayne, David       | Molloy, Eamonn     | Teng, Yko          |
| Gatenby, Paul              | Jennette, Charles  | Monach, Paul       | Tesar, Vladimir    |
| Geetha, Duvuru             | Kallenberg, Cees   | Neumann, Thomas    | Vaglio, Augusto    |
| Geraldes, Ruth             | Karadağ, Ömer      | Novikov, Pavel     |                    |

## ACR-EULAR Classification Criteria for ANCA-Associated Vasculitis

**Supplementary Materials 8. Flow chart of expert review process to create the Diagnosis and Classification of Vasculitis Study dataset for ANCA-associated vasculitis.**

Cases passed by the expert review process were used to derive classification criteria for granulomatosis with polyangiitis, microscopic polyangiitis, and eosinophilic granulomatosis with polyangiitis.

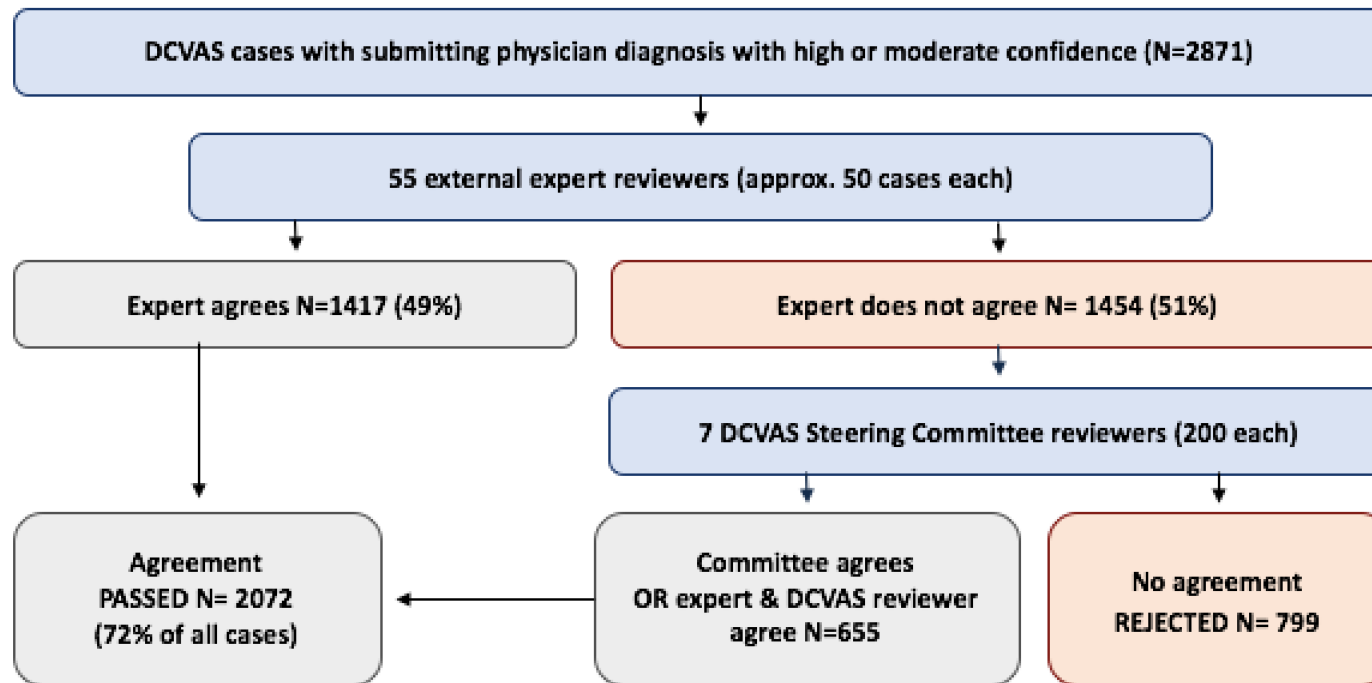



## ACR-EULAR Classification Criteria for ANCA-Associated Vasculitis

**Supplementary Materials 9A. Results of regression analysis (n=91 candidate items) for eosinophilic granulomatosis with polyangiitis. Top ten strongest independent variables**

| Predictor Variables                          | Odds Ratio (95% CI)  | P-value |
|----------------------------------------------|----------------------|---------|
| Serum eosinophil count >1x10 <sup>9</sup> /L | 122.88 (34, 596)     | <0.001  |
| Nasal polyps                                 | 21.56 (3.84, 156.37) | <0.001  |
| Evidence of obstructive airway disease       | 17.3 (4.15, 83.65)   | <0.001  |
| cANCA or anti-PR3-ANCA                       | 0.03 (0, 0.15)       | <0.001  |
| Pauci-immune glomerulonephritis              | 0.02 (0, 0.27)       | 0.01    |
| Extravascular eosinophil inflammation        | 15.72 (1.71, 172.54) | 0.02    |
| Non-productive cough                         | 6.07 (1.46, 28.97)   | 0.02    |
| Mononeuritis multiplex or motor neuropathy   | 3.75 (1.05, 13.73)   | 0.04    |
| Hematuria                                    | 0.26 (0.06, 0.94)    | 0.05    |
| Dyspnea                                      | 2.98 (10.77, 12.48)  | 0.12    |
| Maximum value of serum creatinine            | 1.00 (1.00, 1.00)    | 0.97    |

ANCA: anti-neutrophil cytoplasmic antibody; cANCA: cytoplasmic anti-neutrophil cytoplasmic antibody;  
PR3: proteinase 3

## ACR-EULAR Classification Criteria for ANCA-Associated Vasculitis

**Supplementary Materials 9B. Results of regression analysis (n=91 candidate items) for granulomatosis with polyangiitis.  
Top ten strongest independent variables**

| Predictor Variables                                                                                                                                       | Odds Ratio (95% CI) | P-value |
|-----------------------------------------------------------------------------------------------------------------------------------------------------------|---------------------|---------|
| cANCA or anti-PR3 ANCA positive                                                                                                                           | 142.3 (65.9, 335.0) | <0.001  |
| Nasal bloody discharge, ulcers, crusting, or sinonasal congestion/blockage                                                                                | 28.1 (14.1, 59.4)   | <0.001  |
| Eosinophil count ( $\times 10^9/L$ ) ( $\geq 1$ vs. $< 1$ )                                                                                               | 0.03 (0.01, 0.09)   | <0.001  |
| Granuloma or giant cells on biopsy                                                                                                                        | 13.3 (4.29, 44.8)   | <0.001  |
| Pulmonary nodules, mass, or cavitation on chest imaging                                                                                                   | 7.65 (3.59, 17.0)   | <0.001  |
| Cartilaginous involvement<br>(cartilage inflammation of the ear or nose, hoarse voice or stridor,<br>endobronchial involvement, or saddle nose deformity) | 9.48 (3.51, 27.9)   | <0.001  |
| pANCA or anti-MPO ANCA positive                                                                                                                           | 0.30 (0.15, 0.60)   | <0.001  |
| Nasal polyps                                                                                                                                              | 0.16 (0.04, 0.53)   | <0.001  |
| Abdominal pain                                                                                                                                            | 0.21 (0.08, 0.51)   | <0.001  |
| Inflammation, consolidation, or effusion of the nasal/paranasal sinuses on<br>imaging                                                                     | 3.13 (1.38, 7.37)   | <0.001  |

ANCA: anti-neutrophil cytoplasmic antibody; cANCA: cytoplasmic anti-neutrophil cytoplasmic antibody; PR3: proteinase 3; pANCA: perinuclear anti-neutrophil cytoplasmic antibody; MPO: myeloperoxidase

## ACR-EULAR Classification Criteria for ANCA-Associated Vasculitis

**Supplementary Materials 9C. Results of regression analysis (n=91 candidate items) for microscopic polyangiitis. Top ten strongest independent variables**

| Predictor Variables                                                                                                | Odds Ratio (95% CI)     | P-value |
|--------------------------------------------------------------------------------------------------------------------|-------------------------|---------|
| pANCA or anti-MPO ANCA positive                                                                                    | 251.22 (64.78, 1587.65) | <0.01   |
| Maximum serum eosinophil count $\geq 1 \times 10^9/L$                                                              | 0.02 (0.004, 0.10)      | <0.01   |
| Nasal bloody discharge, ulcers, crusting, or sinonasal congestion or blockage, or nasal septal defect /perforation | 0.09 (0.03, 0.26)       | <0.01   |
| Pauci-immune glomerulonephritis on biopsy                                                                          | 10.73 (3.73, 36.09)     | <0.01   |
| Fibrosis or interstitial lung disease on chest imaging                                                             | 16.23 (4.00, 85.26)     | <0.01   |
| Significant anemia (Hb <10g/dL)                                                                                    | 3.61 (1.30, 10.71)      | 0.02    |
| Microscopic hematuria                                                                                              | 1.83 (0.69, 4.87)       | 0.22    |
| cANCA or anti-PR3 ANCA positive                                                                                    | 0.25 (0.07, 0.89)       | 0.03    |
| Maximum value of serum creatinine                                                                                  | 1.06 (0.87, 1.35)       | 0.61    |

ANCA: anti-neutrophil cytoplasmic antibody; cANCA: cytoplasmic anti-neutrophil cytoplasmic antibody; MPO: myeloperoxidase; pANCA: perinuclear anti-neutrophil cytoplasmic antibody; PR3: proteinase 3; Hb: hemoglobin

## ACR-EULAR Classification Criteria for ANCA-Associated Vasculitis

**Supplementary Table 10A. Data-driven and clinically-selected seven-item model for classification of eosinophilic granulomatosis with polyangiitis with associated risk score based off beta coefficient weighting.**

| Predictor Variables                        | Odds Ratio (95% CI)    | Beta Coefficient | Risk Score |
|--------------------------------------------|------------------------|------------------|------------|
| Eosinophil count >1x10 <sup>9</sup> /L     | 109.57 (36.05, 410.43) | 4.70             | +5         |
| Nasal polyps                               | 14.44 (3.64, 66.45)    | 2.89             | +3         |
| Evidence of obstructive airway disease     | 19.75 (5.91, 60.31)    | -3.27            | +3         |
| cANCA or anti-PR3-ANCA                     | 0.04 (0.01, 0.15)      | 2.67             | -3         |
| Extravascular eosinophil inflammation      | 10.68 (1.59, 97.24)    | 2.37             | +2         |
| Mononeuritis multiplex or motor neuropathy | 3.19 (1.07, 9.62)      | 1.16             | +1         |
| Hematuria                                  | 0.23 (0.07, 0.67)      | -1.48            | -1         |

ANCA: anti-neutrophil cytoplasmic antibody; cANCA: cytoplasmic anti-neutrophil cytoplasmic antibody; PR3: proteinase 3

## ACR-EULAR Classification Criteria for ANCA-Associated Vasculitis

**Supplementary Materials 10B: Data-driven and clinically-selected ten-item model for classification of granulomatosis with polyangiitis with associated risk scored based off beta coefficient weighting**

| Predictor Variables                                                                                                                                 | Odds Ratio (95% CI) | Beta Coefficient | Risk Score |
|-----------------------------------------------------------------------------------------------------------------------------------------------------|---------------------|------------------|------------|
| cANCA or anti-PR3 ANCA positive                                                                                                                     | 100.0 (53.8, 196.2) | 4.61             | +5         |
| Nasal bloody discharge, ulcers, crusting, or sinonasal congestion                                                                                   | 16.9 (9.38, 31.6)   | 2.83             | +3         |
| Granuloma, or giant cells, extravascular granulomatous inflammation on biopsy                                                                       | 8.94 (3.59, 22.7)   | 2.19             | +2         |
| Pulmonary nodules, mass, or cavitation on chest imaging                                                                                             | 6.40 (3.31, 12.66)  | 1.86             | +2         |
| Cartilaginous involvement (cartilage inflammation of the ear or nose, hoarse voice or stridor, endobronchial involvement, or saddle nose deformity) | 6.84 (2.92, 16.7)   | 1.92             | +2         |
| Hearing loss (conductive or sensorineural)                                                                                                          | 3.22 (1.35, 7.91)   | 1.17             | +1         |
| Pauci-immune glomerulonephritis                                                                                                                     | 2.17 (1.19, 4.01)   | 0.75             | +1         |
| Inflammation, consolidation, or effusion of the nasal/paranasal sinuses or mastoiditis on imaging                                                   | 2.11 (1.07, 4.23)   | 0.75             | +1         |
| pANCA- or anti-MPO ANCA-positive                                                                                                                    | 0.30 (0.16, 0.53)   | -1.21            | -1         |
| Maximum serum eosinophil count ( $\times 10^9/L$ ) ( $\geq 1$ vs. $< 1$ )                                                                           | 0.03 (0.01, 0.06)   | -3.58            | -4         |

ANCA: anti-neutrophil cytoplasmic antibody; cANCA: cytoplasmic ANCA; MPO: myeloperoxidase; pANCA: perinuclear ANCA; PR3: proteinase 3

## ACR-EULAR Classification Criteria for ANCA-Associated Vasculitis

**Supplementary Table 10C. Data-driven and clinically-selected six-item model for classification of microscopic polyangiitis with associated risk scored based off beta coefficient weighting**

| Predictor Variables                                              | Odds Ratio (95% CI)  | Beta Coefficient | Risk Score |
|------------------------------------------------------------------|----------------------|------------------|------------|
| pANCA- or anti-MPO ANCA-positive                                 | 284.7 (83.7, 1481.2) | 5.65             | +6         |
| Pauci-immune glomerulonephritis                                  | 15.5 (5.71, 49.2)    | 2.74             | +3         |
| Fibrosis or interstitial lung disease on chest imaging           | 13.2 (3.7, 57.2)     | 2.58             | +3         |
| Serum eosinophil count $\geq 1 \times 10^9/L$                    | 0.03 (0.01, 0.09)    | -3.68            | -4         |
| Nasal bloody discharge, ulcers, crusting or sinonasal congestion | 0.07 (0.02, 0.19)    | -2.71            | -3         |
| cANCA- or anti-PR3 ANCA-positive                                 | 0.25 (0.06, 0.88)    | -1.39            | -1         |

ANCA: anti-neutrophil cytoplasmic antibody; cANCA: cytoplasmic ANCA; MPO: myeloperoxidase; pANCA: perinuclear ANCA; PR3: proteinase 3.

## ACR-EULAR Classification Criteria for ANCA-Associated Vasculitis

**Supplementary Materials 11A: Performance characteristics of a points-based risk score for eosinophilic granulomatosis with polyangiitis with different thresholds in the development set**

| Threshold Score | Sensitivity (%) | Specificity (%) |
|-----------------|-----------------|-----------------|
| 1               | 99.2            | 55.1            |
| 2               | 95.8            | 83.5            |
| 3               | 95.8            | 89.0            |
| 4               | 92.4            | 95.2            |
| 5               | 89.1            | 97.5            |
| 6               | 84.9            | 99.1            |
| 7               | 76.5            | 99.3            |
| 8               | 68.1            | 100.0           |

A total score of  $\geq 6$  was considered the best cut-point to provide high enough specificity for purposes of enrolling patients into clinical trials without compromising sensitivity. If a higher total score is chosen, specificity increases but there is a corresponding disproportionate drop in sensitivity. When scoring an individual patient, the higher the score, the higher the specificity for eosinophilic granulomatosis with polyangiitis.

## ACR-EULAR Classification Criteria for ANCA-Associated Vasculitis

**Supplementary Materials 11B: Performance characteristics of a points-based risk score for granulomatosis with polyangiitis with different thresholds in the development set**

| Threshold Score | Sensitivity (%) | Specificity (%) |
|-----------------|-----------------|-----------------|
| 3               | 97.3            | 90.7            |
| 4               | 94.5            | 92.5            |
| 5               | 92.5            | 93.8            |
| 6               | 84.2            | 98.1            |

A total score of  $\geq 5$  was considered the best cut-point to provide high enough specificity for purposes of enrolling patients into clinical trials without compromising sensitivity. If a higher total score is chosen, specificity increases but there is a corresponding disproportionate drop in sensitivity. When scoring an individual patient, the higher the score, the higher the specificity for granulomatosis with polyangiitis.



## ACR-EULAR Classification Criteria for ANCA-Associated Vasculitis

**Supplementary Materials 11C: Performance characteristics of a points-based risk score for microscopic polyangiitis with different thresholds in the development set**

| Threshold Score | Sensitivity (%) | Specificity (%) |
|-----------------|-----------------|-----------------|
| 1               | 98.6            | 82.1            |
| 2               | 98.6            | 82.6            |
| 3               | 94.3            | 90.6            |
| 4               | 90.8            | 94.0            |
| 5               | 90.8            | 94.2            |
| 6               | 86.6            | 95.7            |
| 7               | 50.7            | 98.1            |

A total score of  $\geq 5$  was considered the best cut-point to provide high enough specificity for purposes of enrolling patients into clinical trials without compromising sensitivity. If a higher total score is chosen, specificity increases but there is a corresponding disproportionate drop in sensitivity. When scoring an individual patient, the higher the score, the higher the specificity for microscopic polyangiitis.

## ACR-EULAR Classification Criteria for ANCA-Associated Vasculitis

**Supplementary Materials 12A. Discrimination curves for the classification criteria for eosinophilic granulomatosis with polyangiitis.**

Classification criteria applied to 1,113 cases confirmed by Expert Review, 226 with EGPA and 887 comparators divided into a development set (50%) and validation set (50%). The Area Under Curve (AUC) for the development set is shown (solid line) and the AUC for the validation set is shown (dotted line).

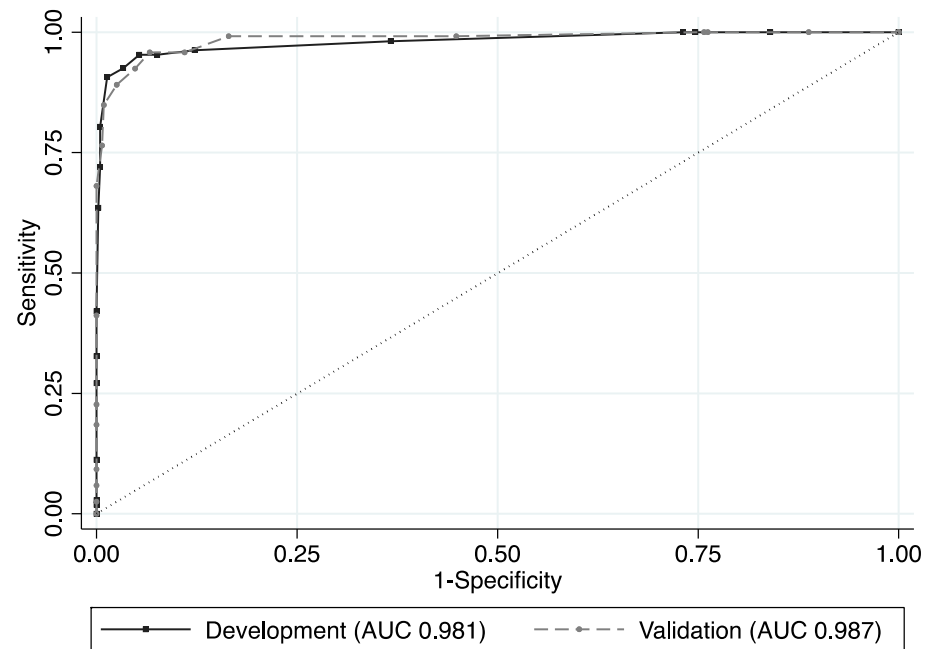

## ACR-EULAR Classification Criteria for ANCA-Associated Vasculitis

**Supplementary Materials 12B. Discrimination curves for the classification criteria for granulomatosis with polyangiitis.**

Classification criteria applied to 1537 cases confirmed by Expert Review (N= 1537), 724 with GPA (47.1%) and 813 (52.9%) comparators divided into a development set (80%) and validation set (20%). The Area Under Curve (AUC) for the development set is shown (solid line) and the AUC for the validation set is shown (dotted line).

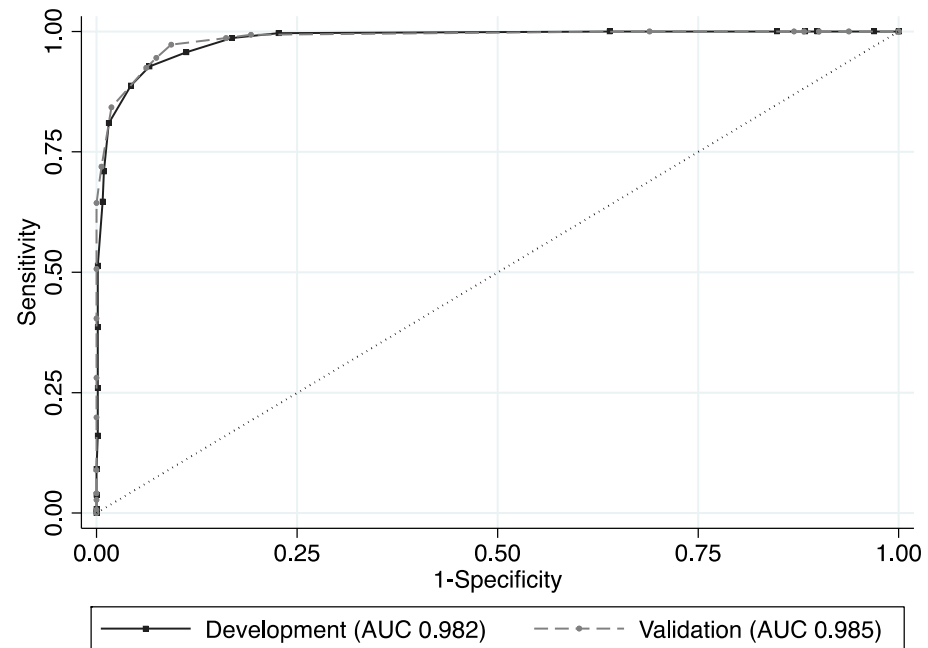

## ACR-EULAR Classification Criteria for ANCA-Associated Vasculitis

**Supplementary Materials 12C. Discrimination curves for the classification criteria for microscopic polyangiitis.**

Classification criteria applied to 1,113 cases confirmed by Expert Review, 291 with MPA and 822 comparators divided into a development set (50%) and validation set (50%). The Area Under Curve (AUC) for the development set is shown (solid line) and the AUC for the validation set is shown (dotted line).

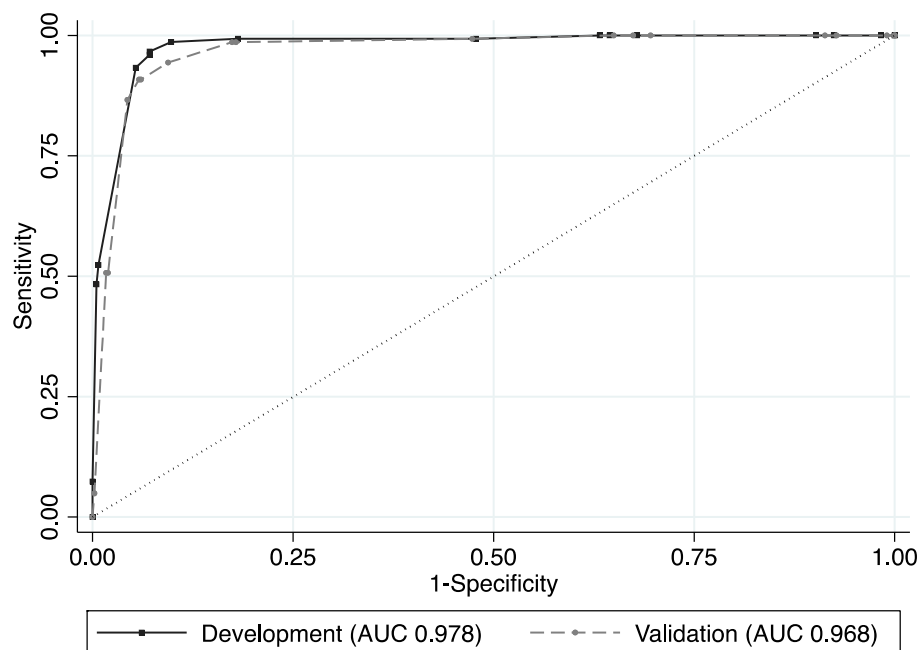

Supplement: annrheumdis-2021-221794supp001_data_supplement.pdf [file annrheumdis-2021-221794supp001_data_supplement.pdf]
